# Supplementary material
Source: PubMed Central journal article supplement (PMC7968388)
Supplement: NIHMS1621163-supplement-1.pdf [file NIHMS1621163-supplement-1.pdf]

APPENDIX A. Classification of Web of Science categories into non-clinical basic science, clinical science, multidisciplinary science, and other science based on NSF's classification of fields of study

| #  | Counts | Web of Science Category                       | Non-Clinical | Clinical | Multi-disc | Other | Name on NSF list                                             |
|----|--------|-----------------------------------------------|--------------|----------|------------|-------|--------------------------------------------------------------|
| 1  | 115402 | Biochemistry & Molecular Biology              | X            |          |            |       | Biochemistry                                                 |
| 2  | 86350  | Neurosciences                                 | X            |          |            |       | Neuroscience                                                 |
| 3  | 65035  | Cell Biology                                  | X            |          |            |       | Cell Biology and Anatomy                                     |
| 4  | 55905  | Multidisciplinary Sciences                    |              |          | X          |       | NA                                                           |
| 5  | 47710  | Oncology                                      |              | X        |            |       | Oncology                                                     |
| 6  | 41626  | Immunology                                    | X            |          |            |       | Immunology                                                   |
| 7  | 37356  | Genetics & Heredity                           | X            |          |            |       | Genetics, General                                            |
| 8  | 37293  | Public, Environmental & Occupational Health   |              | X        |            |       | Occupational Health and Industrial Hygiene                   |
| 9  | 31937  | Psychiatry                                    |              | X        |            |       | Psychiatry                                                   |
| 10 | 30352  | Pharmacology & Pharmacy                       |              | X        |            |       | Pharmacy (PharmD [United States] PharmD, BS/BPharm [Canada]) |
| 11 | 29829  | Endocrinology & Metabolism                    |              | X        |            |       | Endocrinology and Metabolism                                 |
| 12 | 28471  | Physiology                                    | X            |          |            |       | Physiology, General                                          |
| 13 | 27199  | Clinical Neurology                            |              | X        |            |       | Neurology                                                    |
| 14 | 23593  | Biochemical Research Methods                  | X            |          |            |       | Biochemistry                                                 |
| 15 | 23257  | Medicine, Research & Experimental             |              | X        |            |       | Medicine (MD)                                                |
| 16 | 23140  | Radiology, Nuclear Medicine & Medical Imaging |              | X        |            |       | Nuclear Radiology                                            |
| 17 | 22414  | Chemistry, Multidisciplinary                  | X            |          |            |       | Chemistry, Other                                             |
| 18 | 22399  | Microbiology                                  | X            |          |            |       | Microbiology, General                                        |
| 19 | 21071  | Cardiac & Cardiovascular Systems              | X            |          |            |       | Cardiovascular Science                                       |
| 20 | 19993  | Biophysics                                    | X            |          |            |       | Biophysics                                                   |
| 21 | 19358  | Infectious Diseases                           |              | X        |            |       | Infectious Disease                                           |
| 22 | 18593  | Biotechnology & Applied Microbiology          | X            |          |            |       | Microbiology, General                                        |
| 23 | 18444  | Hematology                                    |              | X        |            |       | Hematology                                                   |
| 24 | 18320  | Peripheral Vascular Disease                   |              | X        |            |       | Vascular Surgery                                             |
| 25 | 17960  | Virology                                      | X            |          |            |       | Virology                                                     |
| 26 | 15271  | Surgery                                       |              | X        |            |       | General Surgery                                              |
| 27 | 14767  | Pediatrics                                    |              | X        |            |       | Pediatrics                                                   |
| 28 | 13974  | Psychology, Clinical                          | X            |          |            |       | Clinical Psychology                                          |
| 29 | 13493  | Psychology                                    | X            |          |            |       | Psychology, General                                          |
| 30 | 13300  | Engineering, Biomedical                       | X            |          |            |       | Biomedical/Medical Engineering                               |
| 31 | 12892  | Developmental Biology                         | X            |          |            |       | Developmental Biology and Embryology                         |
| 32 | 12744  | Ophthalmology                                 |              | X        |            |       | Ophthalmology                                                |
| 33 | 12189  | Medicine, General & Internal                  |              | X        |            |       | Internal Medicine                                            |
| 34 | 11732  | Substance Abuse                               |              |          |            | X     | Substance Abuse/Addiction Counseling                         |
| 35 | 11469  | Psychology, Developmental                     | X            |          |            |       | Developmental and Child Psychology                           |
| 36 | 11310  | Mathematical & Computational Biology          | X            |          |            |       | Biomathematics and Bioinformatics, Other                     |
| 37 | 11305  | Respiratory System                            |              | X        |            |       | Pulmonary Disease                                            |
| 38 | 11018  | Chemistry, Organic                            | X            |          |            |       | Organic Chemistry                                            |
| 39 | 10869  | Toxicology                                    | X            |          |            |       | Toxicology                                                   |
| 40 | 10744  | Urology & Nephrology                          |              | X        |            |       | Urology                                                      |
| 41 | 10456  | Gastroenterology & Hepatology                 |              | X        |            |       | Gastroenterology                                             |
| 42 | 10263  | Chemistry, Medicinal                          | X            |          |            |       | Medicinal and Pharmaceutical Chemistry                       |
| 43 | 10149  | Behavioral Sciences                           |              |          |            | X     | Behavioral Sciences                                          |
| 44 | 10104  | Nutrition & Dietetics                         |              | X        |            |       | Dietetics and Clinical Nutrition Services, Other             |
| 45 | 9858   | Psychology, Experimental                      | X            |          |            |       | Experimental Psychology                                      |
| 46 | 9498   | Biology                                       | X            |          |            |       | Biology/Biological Sciences, General                         |
| 47 | 9337   | Geriatrics & Gerontology                      |              |          |            | X     | Gerontology                                                  |
| 48 | 9138   | Health Care Sciences & Services               |              | X        |            |       | Health/Health Care Administration/Management                 |
| 49 | 8887   | Chemistry, Analytical                         | X            |          |            |       | Analytical Chemistry                                         |
| 50 | 8838   | Chemistry, Physical                           | X            |          |            |       | Chemical Physics                                             |
| 51 | 8782   | Obstetrics & Gynecology                       |              | X        |            |       | Obstetrics and Gynecology                                    |
| 52 | 7722   | Psychology, Multidisciplinary                 | X            |          |            |       | Psychology, Other                                            |
| 53 | 7363   | Statistics & Probability                      | X            |          |            |       | Mathematical Statistics and Probability                      |
| 54 | 7175   | Health Policy & Services                      |              |          |            | X     | Public Policy Analysis                                       |
| 55 | 6912   | Gerontology                                   |              |          |            | X     | Gerontology                                                  |

| #   | Counts | Web of Science Category                          | Non-Clinical | Clinical | Multi-disc | Other | Name on NSF list                                                          |
|-----|--------|--------------------------------------------------|--------------|----------|------------|-------|---------------------------------------------------------------------------|
| 56  | 6483   | Pathology                                        |              | X        |            |       | Pathology                                                                 |
| 57  | 6209   | Computer Science, Interdisciplinary Applications | X            |          |            |       | Computer Science, Other                                                   |
| 58  | 5984   | Critical Care Medicine                           |              | X        |            |       | Critical Care Medicine                                                    |
| 59  | 5934   | Environmental Sciences                           | X            |          |            |       | Environmental Science                                                     |
| 60  | 5919   | Nanoscience & Nanotechnology                     | X            |          |            |       | NA                                                                        |
| 61  | 5645   | Neuroimaging                                     |              | X        |            |       | Diagnostic Radiology                                                      |
| 62  | 5611   | Sport Sciences                                   |              | X        |            |       | Sports Medicine                                                           |
| 63  | 5415   | Rehabilitation                                   |              | X        |            |       | Physical and Rehabilitation Medicine                                      |
| 64  | 5325   | Materials Science, Biomaterials                  | X            |          |            |       | Materials Science                                                         |
| 65  | 5250   | Materials Science, Multidisciplinary             | X            |          |            |       | Materials Science                                                         |
| 66  | 5207   | Parasitology                                     | X            |          |            |       | Parasitology                                                              |
| 67  | 5043   | Transplantation                                  |              | X        |            |       | Nephrology                                                                |
| 68  | 5027   | Audiology & Speech-Language Pathology            |              | X        |            |       | Audiology/Audiologist and Speech-Language Pathology/Pathologist           |
| 69  | 4761   | Social Sciences, Biomedical                      |              |          |            | X     | Social Sciences, Other                                                    |
| 70  | 4664   | Nursing                                          |              | X        |            |       | Nursing—Registered Nurse Training (RN, ASN, BSN, MSN)                     |
| 71  | 4422   | Zoology                                          | X            |          |            |       | Zoology/Animal Biology                                                    |
| 72  | 4383   | Orthopedics                                      |              | X        |            |       | Orthopedics/Orthopedic Surgery                                            |
| 73  | 4302   | Otorhinolaryngology                              |              | X        |            |       | Otolaryngology                                                            |
| 74  | 4268   | Rheumatology                                     |              | X        |            |       | Rheumatology                                                              |
| 75  | 4069   | Reproductive Biology                             | X            |          |            |       | Reproductive Biology                                                      |
| 76  | 3981   | Cell & Tissue Engineering                        | X            |          |            |       | Biomedical/Medical Engineering                                            |
| 77  | 3972   | Optics                                           | X            |          |            |       | Optics/Optical Sciences                                                   |
| 78  | 3720   | Medical Informatics                              |              |          |            | X     | Medical Informatics                                                       |
| 79  | 3671   | Dentistry, Oral Surgery & Medicine               |              | X        |            |       | Dentistry (DDS, DMD)                                                      |
| 80  | 3261   | Evolutionary Biology                             | X            |          |            |       | Evolutionary Biology                                                      |
| 81  | 3152   | Spectroscopy                                     | X            |          |            |       | Radiation Biology/Radiobiology                                            |
| 82  | 3049   | Family Studies                                   |              |          |            | X     | Human Development and Family Studies, General                             |
| 83  | 3023   | Acoustics                                        | X            |          |            |       | Acoustics                                                                 |
| 84  | 2992   | Anesthesiology                                   |              | X        |            |       | Anesthesiology                                                            |
| 85  | 2977   | Psychology, Biological                           | X            |          |            |       | Psychology, Other                                                         |
| 86  | 2909   | Physics, Atomic, Molecular & Chemical            | X            |          |            |       | Atomic/Molecular Physics                                                  |
| 87  | 2884   | Dermatology                                      |              | X        |            |       | Dermatology                                                               |
| 88  | 2866   | Plant Sciences                                   | X            |          |            |       | Plant Sciences, General                                                   |
| 89  | 2758   | Physics, Applied                                 | X            |          |            |       | Physics, Other                                                            |
| 90  | 2579   | Veterinary Sciences                              |              | X        |            |       | Veterinary Sciences/Veterinary Clinical Sciences, General (Cert, MS, PhD) |
| 91  | 2523   | Linguistics                                      |              |          |            | X     | Linguistics                                                               |
| 92  | 2391   | Tropical Medicine                                |              | X        |            |       | Community Health and Preventive Medicine                                  |
| 93  | 2304   | Psychology, Social                               | X            |          |            |       | Social Psychology                                                         |
| 94  | 2211   | Engineering, Electrical & Electronic             | X            |          |            |       | Electrical, Electronics, and Communications Engineering                   |
| 95  | 2118   | Allergy                                          |              | X        |            |       | Allergies and Immunology                                                  |
| 96  | 2059   | Anatomy & Morphology                             | X            |          |            |       | Anatomy                                                                   |
| 97  | 1940   | Ecology                                          | X            |          |            |       | Ecology                                                                   |
| 98  | 1937   | Chemistry, Inorganic & Nuclear                   | X            |          |            |       | Inorganic Chemistry                                                       |
| 99  | 1740   | Physics, Condensed Matter                        | X            |          |            |       | Solid State and Low-Temperature Physics                                   |
| 100 | 1683   | Social Sciences, Interdisciplinary               |              |          |            | X     | Social Sciences, Other                                                    |
| 101 | 1633   | Polymer Science                                  | X            |          |            |       | Polymer Chemistry                                                         |
| 102 | 1607   | Sociology                                        |              |          |            | X     | Sociology                                                                 |
| 103 | 1576   | Social Work                                      |              |          |            | X     | Social Work                                                               |
| 104 | 1561   | Food Science & Technology                        | X            |          |            |       | Food Science                                                              |
| 105 | 1522   | Emergency Medicine                               |              | X        |            |       | Emergency Medicine                                                        |
| 106 | 1467   | Computer Science, Information Systems            | X            |          |            |       | Computer and Information Sciences, General                                |
| 107 | 1368   | Education & Educational Research                 |              |          |            | X     | Education, General                                                        |
| 108 | 1360   | Psychology, Educational                          |              |          |            | X     | Educational Psychology                                                    |
| 109 | 1287   | Education, Scientific Disciplines                |              |          |            | X     | Science Teacher Education/General Science Teacher Education               |
| 110 | 1220   | Entomology                                       | X            |          |            |       | Entomology                                                                |
| 111 | 1212   | Computer Science, Artificial Intelligence        | X            |          |            |       | Artificial Intelligence and Robotics                                      |
| 112 | 1183   | Medical Laboratory Technology                    |              | X        |            |       | Laboratory Medicine                                                       |
| 113 | 1180   | Demography                                       |              |          |            | X     | Demography and Population Studies                                         |
| 114 | 1153   | Information Science & Library Science            |              |          |            | X     | Library Science/Librarianship                                             |
| 115 | 1151   | Women's Studies                                  |              |          |            | X     | Women's Studies                                                           |
| 116 | 1128   | Mycology                                         | X            |          |            |       | Mycology                                                                  |
| 117 | 1116   | Crystallography                                  | X            |          |            |       | Atomic/Molecular Physics                                                  |
| 118 | 1116   | Engineering, Environmental                       | X            |          |            |       | Environmental/Environmental Health Engineering                            |
| 119 | 1030   | Chemistry, Applied                               | X            |          |            |       | Chemistry, Other                                                          |

| #   | Counts | Web of Science Category                     | Non-Clinical | Clinical | Multi-disc | Other | Name on NSF list                                                  |
|-----|--------|---------------------------------------------|--------------|----------|------------|-------|-------------------------------------------------------------------|
| 120 | 1024   | Economics                                   |              |          |            | X     | Economics, General                                                |
| 121 | 886    | Imaging Science & Photographic Technology   |              | X        |            |       | Diagnostic Radiology                                              |
| 122 | 859    | Psychology, Applied                         | X            |          |            |       | Psychology, Other                                                 |
| 123 | 835    | Mathematics, Interdisciplinary Applications | X            |          |            |       | Applied Mathematics, Other                                        |
| 124 | 827    | Education, Special                          |              |          |            | X     | Special Education and Teaching, General                           |
| 125 | 766    | Integrative & Complementary Medicine        |              | X        |            |       | Alternative and Complementary Medicine and Medical Systems, Other |
| 126 | 761    | Physics, Mathematical                       | X            |          |            |       | Theoretical and Mathematical Physics                              |
| 127 | 751    | Instruments & Instrumentation               | X            |          |            |       | Instrumentation Technology/Technician                             |
| 128 | 667    | Criminology & Penology                      |              |          |            | X     | Criminology                                                       |
| 129 | 657    | Physics, Multidisciplinary                  | X            |          |            |       | Physics, Other                                                    |
| 130 | 648    | Anthropology                                |              |          |            | X     | Anthropology                                                      |
| 131 | 638    | Physics, Fluids & Plasmas                   | X            |          |            |       | Plasma and High-Temperature Physics                               |
| 132 | 614    | Psychology, Mathematical                    | X            |          |            |       | Psychology, Other                                                 |
| 133 | 546    | Communication                               |              |          |            | X     | Communication Studies/Speech Communication and Rhetoric           |
| 134 | 533    | Nuclear Science & Technology                | X            |          |            |       | Nuclear Engineering                                               |
| 135 | 512    | Primary Health Care                         |              | X        |            |       | Health/Health Care Administration/Management                      |
| 136 | 505    | Ethics                                      |              |          |            | X     | Ethics                                                            |
| 137 | 477    | Microscopy                                  | X            |          |            |       | Instrumentation Technology/Technician                             |
| 138 | 470    | Electrochemistry                            | X            |          |            |       | Chemistry, Other                                                  |
| 139 | 430    | Marine & Freshwater Biology                 | X            |          |            |       | Marine Biology and Biological Oceanography                        |
| 140 | 418    | Medical Ethics                              |              |          |            | X     | Bioethics/Medical Ethics                                          |
| 141 | 379    | Ergonomics                                  |              | X        |            |       | NA                                                                |
| 142 | 376    | Mathematics, Applied                        | X            |          |            |       | Applied Mathematics                                               |
| 143 | 375    | Social Sciences, Mathematical Methods       |              |          |            | X     | Social Sciences, Other                                            |
| 144 | 337    | Agriculture, Multidisciplinary              | X            |          |            |       | Agriculture, Agriculture Operations, and Related Sciences, Other  |
| 145 | 336    | Computer Science, Theory & Methods          | X            |          |            |       | Computer Science                                                  |
| 146 | 309    | Law                                         |              |          |            | X     | Law (LLB, JD)                                                     |
| 147 | 307    | Social Issues                               |              |          |            | X     | Social Sciences, Other                                            |
| 148 | 281    | Computer Science, Software Engineering      | X            |          |            |       | Computer Software Engineering                                     |
| 149 | 281    | Ethnic Studies                              |              |          |            | X     | Ethnic, Cultural Minority, and Gender Studies, Other              |
| 150 | 270    | Engineering, Chemical                       | X            |          |            |       | Chemical Engineering                                              |
| 151 | 254    | Andrology                                   |              | X        |            |       | Urology                                                           |
| 152 | 244    | Medicine, Legal                             |              | X        |            |       | Medical Scientist (MS, Ph.D.)                                     |
| 153 | 244    | Meteorology & Atmospheric Sciences          | X            |          |            |       | Atmospheric Sciences and Meteorology, General                     |
| 154 | 240    | Water Resources                             | X            |          |            |       | Hydrology and Water Resources Science                             |
| 155 | 225    | Engineering, Industrial                     | X            |          |            |       | Industrial Engineering                                            |
| 156 | 224    | Language & Linguistics                      |              |          |            | X     | Linguistics                                                       |
| 157 | 211    | Agriculture, Dairy & Animal Science         | X            |          |            |       | Dairy Science                                                     |
| 158 | 206    | Transportation                              |              |          |            | X     | Transportation/Transportation Management                          |
| 159 | 205    | Fisheries                                   | X            |          |            |       | Fishing and Fisheries Sciences and Management                     |
| 160 | 205    | Mechanics                                   | X            |          |            |       | Engineering Mechanics                                             |
| 161 | 165    | Environmental Studies                       |              |          |            | X     | Environmental Studies                                             |
| 162 | 154    | Automation & Control Systems                | X            |          |            |       | Electrical, Electronics, and Communications Engineering           |
| 163 | 152    | Religion                                    |              |          |            | X     | Religion/Religious Studies                                        |
| 164 | 151    | Political Science                           |              |          |            | X     | Political Science and Government, General                         |
| 165 | 146    | Computer Science, Cybernetics               | X            |          |            |       | Computer Science, Other                                           |
| 166 | 145    | Engineering, Multidisciplinary              | X            |          |            |       | Engineering, General                                              |
| 167 | 121    | Engineering, Mechanical                     | X            |          |            |       | Mechanical Engineering                                            |
| 168 | 121    | Geography                                   |              |          |            | X     | Geography                                                         |
| 169 | 103    | Geosciences, Multidisciplinary              | X            |          |            |       | Geological and Earth Sciences/Geosciences, Other                  |
| 170 | 97     | Robotics                                    | X            |          |            |       | Artificial Intelligence and Robotics                              |
| 171 | 95     | Management                                  |              |          |            | X     | Business Administration and Management, General                   |
| 172 | 94     | Hospitality, Leisure, Sport & Tourism       |              |          |            | X     | Parks, Recreation, and Leisure Studies                            |
| 173 | 82     | Biodiversity Conservation                   | X            |          |            |       | Ecology, Evolution, Systematics, and Population Biology, Other    |
| 174 | 77     | History & Philosophy Of Science             |              |          |            | X     | History and Philosophy of Science and Technology                  |
| 175 | 74     | Planning & Development                      |              |          |            | X     | Land Use Planning and Management/Development                      |
| 176 | 73     | Energy & Fuels                              | X            |          |            |       | Petroleum Engineering                                             |
| 177 | 71     | Urban Studies                               |              |          |            | X     | Urban Studies/Affairs                                             |
| 178 | 68     | Mathematics                                 | X            |          |            |       | Mathematics, General                                              |
| 179 | 67     | Operations Research & Management Science    |              |          |            | X     | Operations Research                                               |
| 180 | 65     | Industrial Relations & Labor                |              |          |            | X     | Labor and Industrial Relations                                    |
| 181 | 62     | Physics, Nuclear                            | X            |          |            |       | Nuclear Physics                                                   |
| 182 | 59     | Construction & Building Technology          | X            |          |            |       | Construction Engineering                                          |
| 183 | 57     | Computer Science, Hardware & Architecture   | X            |          |            |       | Computer Hardware Engineering                                     |
| 184 | 52     | Telecommunications                          | X            |          |            |       | Computer Systems Networking and Telecommunications                |

| #   | Counts | Web of Science Category                       | Non-Clinical | Clinical | Multi-disc | Other | Name on NSF list                                       |
|-----|--------|-----------------------------------------------|--------------|----------|------------|-------|--------------------------------------------------------|
| 185 | 49     | Materials Science, Coatings & Films           | X            |          |            |       | Materials Science                                      |
| 186 | 48     | Business                                      |              |          |            | X     | Business/Managerial Economics                          |
| 187 | 48     | Physics, Particles & Fields                   | X            |          |            |       | Elementary Particle Physics                            |
| 188 | 42     | Agronomy                                      | X            |          |            |       | Soil Science and Agronomy, General                     |
| 189 | 41     | Engineering, Civil                            | X            |          |            |       | Civil Engineering, General                             |
| 190 | 41     | Thermodynamics                                | X            |          |            |       | Mechanical Engineering                                 |
| 191 | 40     | Engineering, Manufacturing                    | X            |          |            |       | Manufacturing Engineering                              |
| 192 | 39     | Business, Finance                             |              |          |            | X     | Finance, General                                       |
| 193 | 38     | Public Administration                         |              |          |            | X     | Public Administration                                  |
| 194 | 35     | History                                       |              |          |            | X     | History, General                                       |
| 195 | 35     | Philosophy                                    |              |          |            | X     | Philosophy                                             |
| 196 | 33     | Remote Sensing                                | X            |          |            |       | Geological and Earth Sciences/Geosciences, Other       |
| 197 | 32     | Astronomy & Astrophysics                      | X            |          |            |       | Astronomy and Astrophysics, Other                      |
| 198 | 31     | Geography, Physical                           |              |          |            | X     | Geography, Other                                       |
| 199 | 30     | Metallurgy & Metallurgical Engineering        | X            |          |            |       | Metallurgical Engineering                              |
| 200 | 28     | Limnology                                     | X            |          |            |       | Aquatic Biology/Limnology                              |
| 201 | 28     | Psychology, Psychoanalysis                    | X            |          |            |       | Psychoanalysis and Psychotherapy                       |
| 202 | 27     | Area Studies                                  |              |          |            | X     | Area Studies, Other                                    |
| 203 | 27     | GREEN & SUSTAINABLE SCIENCE & TECHNOLOGY      |              |          | X          |       |                                                        |
| 204 | 27     | International Relations                       |              |          |            | X     | International Relations and Affairs                    |
| 205 | 25     | History Of Social Sciences                    |              |          |            | X     | History, Other                                         |
| 206 | 24     | Ornithology                                   | X            |          |            |       | Animal Sciences, General                               |
| 207 | 23     | Geochemistry & Geophysics                     | X            |          |            |       | Geochemistry                                           |
| 208 | 23     | Horticulture                                  | X            |          |            |       | Agricultural and Horticultural Plant Breeding          |
| 209 | 23     | Humanities, Multidisciplinary                 |              |          |            | X     | Humanities/Humanistic Studies                          |
| 210 | 19     | Music                                         |              |          |            | X     | Music, General                                         |
| 211 | 18     | Agricultural Engineering                      | X            |          |            |       | Agricultural/Biological Engineering and Bioengineering |
| 212 | 18     | Soil Science                                  | X            |          |            |       | Soil Science and Agronomy, General                     |
| 213 | 16     | Transportation Science & Technology           | X            |          |            |       | Transportation and Highway Engineering                 |
| 214 | 15     | Materials Science, Ceramics                   | X            |          |            |       | Materials Science                                      |
| 215 | 15     | Oceanography                                  | X            |          |            |       | Oceanography, Chemical and Physical                    |
| 216 | 14     | Engineering, Aerospace                        | X            |          |            |       | Aerospace, Aeronautical, and Astronautical Engineering |
| 217 | 13     | Materials Science, Characterization & Testing | X            |          |            |       | Materials Science                                      |
| 218 | 11     | Mineralogy                                    | X            |          |            |       | Geochemistry and Petrology                             |
| 219 | 9      | Film, Radio, Television                       |              |          |            | X     | Radio and Television                                   |
| 220 | 9      | Materials Science, Composites                 | X            |          |            |       | Materials Science                                      |
| 221 | 9      | Materials Science, Textiles                   | X            |          |            |       | Materials Science                                      |
| 222 | 7      | Cultural Studies                              |              |          |            | X     | Ethnic, Cultural Minority, and Gender Studies, Other   |
| 223 | 5      | Agricultural Economics & Policy               |              |          |            | X     | Agricultural Economics                                 |
| 224 | 5      | Archaeology                                   |              |          |            | X     | Paleontology                                           |
| 225 | 5      | Forestry                                      | X            |          |            |       | Forestry, General                                      |
| 226 | 5      | Literature                                    |              |          |            | X     | Foreign Languages and Literatures, General             |
| 227 | 5      | Mining & Mineral Processing                   | X            |          |            |       | Mining and Mineral Engineering                         |
| 228 | 2      | Geology                                       | X            |          |            |       | Geology/Earth Science, General                         |
| 229 | 2      | Materials Science, Paper & Wood               | X            |          |            |       | Materials Science                                      |
| 230 | 1      | Logic                                         |              |          |            | X     | Logic                                                  |
